# Supplementary material
Source: PubMed Central journal article supplement (PMC5295163)
Supplement: NIHMS846395-supplement-Supplemental_Table.pdf [file NIHMS846395-supplement-Supplemental_Table.pdf]

**Table S1.** Unadjusted Cox Proportional Hazard Ratio for Cardiovascular Disease Mortality associated with each STANDARDIZED<sup>a</sup> metabolic component by gender- National Health and Nutrition Examination Survey III, United States

|                           | Men  |             |                 |                |         | Women |             |                 |                |         |
|---------------------------|------|-------------|-----------------|----------------|---------|-------|-------------|-----------------|----------------|---------|
|                           | N    | # of events | HR <sup>b</sup> | 95% CI         | P-value | N     | # of events | HR <sup>b</sup> | 95% CI         | P-value |
| <b>All</b>                | 2721 | 220         |                 |                |         | 3038  | 203         |                 |                |         |
| Waist circumference       |      |             | 1.12            | (0.852, 1.473) | 0.418   |       |             | 1.23            | (1.015, 1.499) | 0.035   |
| Systolic blood pressure   |      |             | 1.53            | (1.142, 2.045) | 0.004   |       |             | 1.41            | (1.226, 1.621) | 0.000   |
| Diastolic blood pressure  |      |             | 1.41            | (1.117, 1.783) | 0.004   |       |             | 1.28            | (1.062, 1.533) | 0.009   |
| HDL cholesterol           |      |             | 0.95            | (0.689, 1.315) | 0.765   |       |             | 1.02            | (0.788, 1.327) | 0.867   |
| Triglycerides             |      |             | 1.12            | (1.104, 1.133) | 0.000   |       |             | 1.21            | (1.000, 1.465) | 0.050   |
| Plasma glucose            |      |             | 1.16            | (0.986, 1.370) | 0.074   |       |             | 1.12            | (0.978, 1.281) | 0.101   |
| <b>Non-Hispanic white</b> | 1126 | 122         |                 |                |         | 1318  | 125         |                 |                |         |
| Waist circumference       |      |             | 1.22            | (0.894, 1.672) | 0.208   |       |             | 1.19            | (0.945, 1.496) | 0.140   |
| Systolic blood pressure   |      |             | 1.53            | (1.049, 2.237) | 0.027   |       |             | 1.35            | (1.150, 1.592) | 0.000   |
| Diastolic blood pressure  |      |             | 1.41            | (1.059, 1.876) | 0.019   |       |             | 1.25            | (1.014, 1.535) | 0.037   |
| HDL cholesterol           |      |             | 0.81            | (0.542, 1.196) | 0.283   |       |             | 1.04            | (0.776, 1.398) | 0.786   |
| Triglycerides             |      |             | 1.13            | (1.109, 1.142) | 0.000   |       |             | 1.23            | (0.998, 1.524) | 0.053   |
| Plasma glucose            |      |             | 1.15            | (0.931, 1.421) | 0.193   |       |             | 1.13            | (0.959, 1.325) | 0.147   |
| <b>Non-Hispanic black</b> | 762  | 55          |                 |                |         | 902   | 54          |                 |                |         |
| Waist circumference       |      |             | 0.89            | (0.620, 1.265) | 0.504   |       |             | 1.39            | (1.012, 1.919) | 0.042   |
| Systolic blood pressure   |      |             | 1.52            | (1.127, 2.047) | 0.006   |       |             | 1.52            | (1.265, 1.817) | 0.000   |
| Diastolic blood pressure  |      |             | 1.53            | (1.212, 1.924) | 0.000   |       |             | 1.29            | (1.022, 1.638) | 0.032   |
| HDL cholesterol           |      |             | 1.31            | (1.040, 1.657) | 0.022   |       |             | 0.92            | (0.669, 1.271) | 0.620   |
| Triglycerides             |      |             | 0.80            | (0.453, 1.400) | 0.429   |       |             | 1.41            | (0.909, 2.179) | 0.125   |
| Plasma glucose            |      |             | 1.20            | (1.037, 1.392) | 0.015   |       |             | 1.02            | (0.887, 1.180) | 0.751   |
| <b>Mexican-American</b>   | 833  | 43          |                 |                |         | 818   | 24          |                 |                |         |
| Waist circumference       |      |             | 0.81            | (0.425, 1.524) | 0.505   |       |             | 1.52            | (0.978, 2.351) | 0.063   |
| Systolic blood pressure   |      |             | 1.39            | (0.830, 2.324) | 0.211   |       |             | 2.22            | (1.343, 3.684) | 0.002   |
| Diastolic blood pressure  |      |             | 0.97            | (0.693, 1.344) | 0.835   |       |             | 1.51            | (0.667, 3.415) | 0.323   |
| HDL cholesterol           |      |             | 0.81            | (0.353, 1.850) | 0.614   |       |             | 0.74            | (0.489, 1.111) | 0.145   |
| Triglycerides             |      |             | 1.32            | (0.924, 1.895) | 0.127   |       |             | 1.16            | (0.836, 1.604) | 0.378   |
| Plasma glucose            |      |             | 1.09            | (0.793, 1.501) | 0.594   |       |             | 1.38            | (1.129, 1.678) | 0.002   |

Abbreviations: HR, hazard ratio; CI, confidence interval

<sup>a</sup> All metabolic components were standardized to the normal distribution for the purpose of coefficient comparison across models.

<sup>b</sup> Models adjusted for age.

**Table S2.** P-values for testing differences in structural equation models by gender and race

|                                 | Gender                  |                        | Race                    |                        | Men                     |                        | Women                   |                        |
|---------------------------------|-------------------------|------------------------|-------------------------|------------------------|-------------------------|------------------------|-------------------------|------------------------|
|                                 | Score Test <sup>a</sup> | Wald Test <sup>b</sup> |
| <b>Waist circumference</b>      | <0.0001                 | <0.0001                | 0.015                   | <0.0001                | 0.658                   | 0.0016                 | 0.0001                  | <0.0001                |
| <b>Systolic blood pressure</b>  | <0.0001                 | <0.0001                | 0.012                   | <0.0001                | 0.338                   | 0.0010                 | 0.110                   | 0.0001                 |
| <b>Diastolic blood pressure</b> | 0.732                   | 0.040                  | <0.0001                 | <0.0001                | <0.0001                 | <0.0001                | 0.006                   | <0.0001                |
| <b>HDL cholesterol</b>          | 0.018                   | <0.0001                | <0.0001                 | <0.0001                | <0.0001                 | <0.0001                | 0.003                   | <0.0001                |
| <b>Triglycerides</b>            | <0.0001                 | <0.0001                | 0.001                   | <0.0001                | 0.415                   | <0.0001                | <0.0001                 | <0.0001                |
| <b>Fasting glucose</b>          | 0.043                   | 0.012                  | <0.0001                 | <0.0001                | 0.394                   | <0.0001                | <0.0001                 | <0.0001                |

NOTE: Testing differences in structural equation models could not be performed in the survey setting. Therefore, these results do not consider sampling design or weights.

<sup>a</sup> Score test reported for testing difference in factor loadings across groups. The null hypothesis is that the factor loadings are equal.

<sup>b</sup> Wald test reported for testing difference in the variance for parameters across groups. The null hypothesis is that the variance is equal across groups.

**Table S3.** Unadjusted Cox proportional hazard ratio<sup>a</sup> for the association between Metabolic syndrome (score and traditional definition) and CVD mortality stratified by gender and race – National Health and Nutrition Examination Survey III, United States

|                    | N    | # of events | Metabolic Score <sup>b</sup> |                |         | Metabolic Syndrome |                |         | # of Metabolic Components |                |         |
|--------------------|------|-------------|------------------------------|----------------|---------|--------------------|----------------|---------|---------------------------|----------------|---------|
|                    |      |             | HR                           | 95% CI         | P-value | HR                 | 95% CI         | P-value | HR                        | 95% CI         | P-value |
| <b>Men</b>         | 2721 | 220         | 1.43                         | (1.140, 1.801) | 0.002   | 1.35               | (0.979, 1.859) | 0.067   | 1.13                      | (0.986, 1.298) | 0.079   |
| Non-Hispanic white | 1126 | 122         | 1.61                         | (1.254, 2.064) | 0.0002  | 1.50               | (1.033, 2.169) | 0.033   | 1.16                      | (0.994, 1.359) | 0.060   |
| Non-Hispanic black | 762  | 55          | 0.97                         | (0.672, 1.384) | 0.845   | 0.93               | (0.517, 1.668) | 0.804   | 1.06                      | (0.858, 1.316) | 0.578   |
| Mexican-American   | 833  | 43          | 1.06                         | (0.602, 1.870) | 0.839   | 0.75               | (0.313, 1.782) | 0.511   | 0.98                      | (0.712, 1.336) | 0.876   |
| <b>Women</b>       | 3038 | 203         | 1.40                         | (1.143, 1.714) | 0.001   | 1.46               | (1.067, 1.988) | 0.018   | 1.20                      | (1.103, 1.314) | <0.0001 |
| Non-Hispanic white | 1318 | 125         | 1.33                         | (1.081, 1.644) | 0.007   | 1.34               | (0.963, 1.873) | 0.082   | 1.19                      | (1.086, 1.299) | 0.0002  |
| Non-Hispanic black | 902  | 54          | 2.03                         | (1.304, 3.163) | 0.002   | 2.51               | (1.467, 4.300) | 0.001   | 1.37                      | (1.141, 1.646) | 0.001   |
| Mexican-American   | 818  | 24          | 2.44                         | (1.684, 3.523) | <0.0001 | 2.33               | (0.733, 7.383) | 0.152   | 1.34                      | (1.085, 1.658) | 0.007   |

Abbreviations: HR, hazard ratio; CI, confidence interval

<sup>a</sup>Models adjusted for age.

<sup>b</sup>Metabolic score used in the models were derived specifically for each individual subgroup.

**Table S4.** Goodness-of-fit and Predictability Results for the Comparison Between Models Using Metabolic Score, Metabolic Syndrome, or Number of Metabolic Components by Gender-Race Subgroups

|                    | Metabolic Score           |        |             |             |          | Metabolic Syndrome Prevalence |        |             |             |          |
|--------------------|---------------------------|--------|-------------|-------------|----------|-------------------------------|--------|-------------|-------------|----------|
|                    | AIC                       | BIC    | C statistic | K statistic | R square | AIC                           | BIC    | C statistic | K statistic | R square |
| <b>Men</b>         |                           |        |             |             |          |                               |        |             |             |          |
| Non-Hispanic white | 578.58                    | 623.81 | 0.881       | 0.848       | 0.561    | 581.24                        | 626.48 | 0.881       | 0.847       | 0.553    |
| Non-Hispanic black | 442.48                    | 484.21 | 0.865       | 0.799       | 0.692    | 442.71                        | 484.43 | 0.864       | 0.802       | 0.691    |
| Mexican-American   | 253.32                    | 295.85 | 0.875       | 0.806       | 0.558    | 253.44                        | 295.97 | 0.872       | 0.800       | 0.557    |
| <b>Women</b>       |                           |        |             |             |          |                               |        |             |             |          |
| Non-Hispanic white | 723.51                    | 770.16 | 0.915       | 0.868       | 0.716    | 725.38                        | 772.03 | 0.915       | 0.866       | 0.712    |
| Non-Hispanic black | 465.18                    | 508.42 | 0.912       | 0.819       | 0.898    | 463.83                        | 507.07 | 0.912       | 0.809       | 0.900    |
| Mexican-American   | 140.55                    | 178.20 | 0.922       | 0.842       | 0.800    | 151.40                        | 193.76 | 0.916       | 0.829       | 0.720    |
|                    | # of Metabolic Components |        |             |             |          | All components in model       |        |             |             |          |
|                    | AIC                       | BIC    | C statistic | K statistic | R square | AIC                           | BIC    | C statistic | K statistic | R square |
| <b>Men</b>         |                           |        |             |             |          |                               |        |             |             |          |
| Non-Hispanic white | 581.33                    | 626.57 | 0.881       | 0.847       | 0.553    | 366.74                        | 433.17 | 0.888       | 0.851       | 0.576    |
| Non-Hispanic black | 442.80                    | 484.52 | 0.864       | 0.802       | 0.690    | 355.26                        | 417.09 | 0.899       | 0.815       | 0.805    |
| Mexican-American   | 253.63                    | 296.16 | 0.872       | 0.799       | 0.556    | 195.37                        | 257.12 | 0.881       | 0.795       | 0.614    |
| <b>Women</b>       |                           |        |             |             |          |                               |        |             |             |          |
| Non-Hispanic white | 723.74                    | 770.39 | 0.916       | 0.868       | 0.716    | 478.31                        | 547.49 | 0.928       | 0.873       | 0.764    |
| Non-Hispanic black | 466.69                    | 509.93 | 0.908       | 0.810       | 0.895    | 315.56                        | 379.19 | 0.921       | 0.817       | 0.920    |
| Mexican-American   | 150.97                    | 193.33 | 0.917       | 0.829       | 0.725    | 93.38                         | 154.54 | 0.925       | 0.852       | 0.883    |

AIC, Akaike Information Criterion; BIC, Bayesian Information Criterion; C statistic, Harrell's C-coefficient; K statistic, Gönen and Heller's K-coefficient; R square, Royston's R-square

For both AIC and BIC, smaller number is a better fit.

For R-square, C- and K- statistics, the larger number is a better predictor.

All components in the model include: waist circumference, systolic blood pressure, diastolic blood pressure, HDL cholesterol, triglycerides, and fasting glucose as proxy for metabolic syndrome along with

**Supplemental Figure 1. Metabolic Score Path Diagrams with Standardized Factor Loadings for Each Gender-Race Subgroup without Correlated Errors**

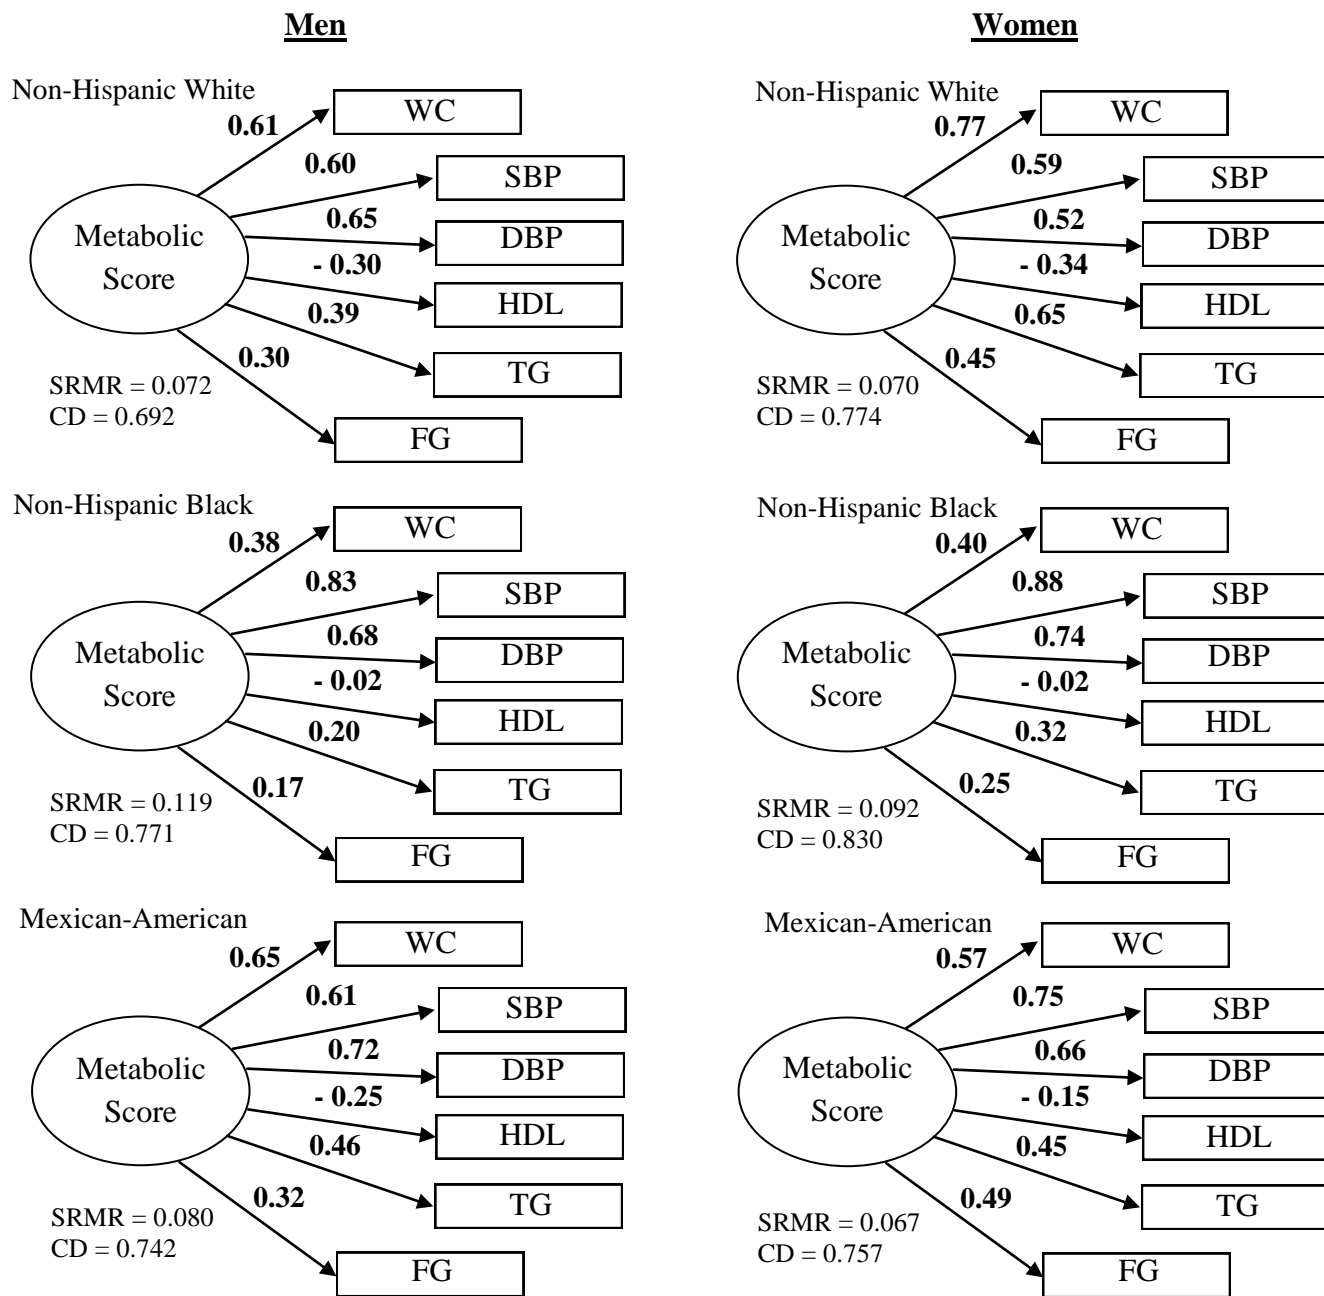

SRMR (Standardized root mean squared residuals)  
 CD (Coefficient of determination)
